# Supplementary material for: Study protocol for assessing knowledge, attitudes and belief towards HPV vaccination of parents with children aged 9–14 years in rural communities of North West Cameroon: a qualitative study
Source: PubMed Central journal article supplement — BMJ Open. 2022 Aug 24;12(8):e062556. doi: 10.1136/bmjopen-2022-062556 (PMC9413282; doi:10.1136/bmjopen-2022-062556), 2022-08-24
Supplement: bmjopen-2022-062556.draft_revisions.pdf [file bmjopen-2022-062556.draft_revisions.pdf]

# BMJ Open

BMJ Open is committed to open peer review. As part of this commitment we make the peer review history of every article we publish publicly available.

When an article is published we post the peer reviewers' comments and the authors' responses online. We also post the versions of the paper that were used during peer review. These are the versions that the peer review comments apply to.

The versions of the paper that follow are the versions that were submitted during the peer review process. They are not the versions of record or the final published versions. They should not be cited or distributed as the published version of this manuscript.

BMJ Open is an open access journal and the full, final, typeset and author-corrected version of record of the manuscript is available on our site with no access controls, subscription charges or pay-per-view fees (<http://bmjopen.bmj.com>).

If you have any questions on BMJ Open's open peer review process please email [info.bmjopen@bmj.com](mailto:info.bmjopen@bmj.com)

# BMJ Open

## Assessing knowledge, attitudes and belief toward HPV vaccination of parents with children aged 9-14 years in rural communities of North West Cameroon: a qualitative study

|                               |                                                                                                                                                                                                                                                                                                                                                                                                                                                                                        |
|-------------------------------|----------------------------------------------------------------------------------------------------------------------------------------------------------------------------------------------------------------------------------------------------------------------------------------------------------------------------------------------------------------------------------------------------------------------------------------------------------------------------------------|
| Journal:                      | <i>BMJ Open</i>                                                                                                                                                                                                                                                                                                                                                                                                                                                                        |
| Manuscript ID                 | bmjopen-2022-062556                                                                                                                                                                                                                                                                                                                                                                                                                                                                    |
| Article Type:                 | Protocol                                                                                                                                                                                                                                                                                                                                                                                                                                                                               |
| Date Submitted by the Author: | 07-Mar-2022                                                                                                                                                                                                                                                                                                                                                                                                                                                                            |
| Complete List of Authors:     | Elit, Lorraine; Baptist Institute for Health Sciences; McMaster University Ngalla, Calvin; Mbingo Hospital, Women's Health Program Afugchwi, Glen; Baptist Institute for Health Science, Pediatric Oncology Tum, Eric; Information and Vocational Orientation Centre Fokom-Domgue, Joël; Faculty of Medicine and Biomedical Sciences, University of Yaoundé I, Yaoundé, Cameroon, Department of Obstetrics and Gynecology Nouvet, Elysée; Western University, School of Health Studies |
| Keywords:                     | INFECTIOUS DISEASES, Public health < INFECTIOUS DISEASES, PUBLIC HEALTH                                                                                                                                                                                                                                                                                                                                                                                                                |
|                               |                                                                                                                                                                                                                                                                                                                                                                                                                                                                                        |

SCHOLARONE™  
Manuscripts

1  
2  
3 Title: Assessing knowledge, attitudes and belief toward HPV vaccination of parents with children aged 9-  
4 14 years in rural communities of North West Cameroon: a qualitative study  
5

6 <sup>1,2,3</sup> Elit L, <sup>2</sup>Ngalla C, <sup>2</sup>Afugchwi G, <sup>4</sup>Tum E, <sup>5</sup>Folkom-Domgue J, <sup>6</sup>Nouvet E.  
7

8 Affiliations  
9

10 <sup>1</sup>Baptist Health Institute of Science, Mbingo, NW Cameroon  
11

12 <sup>2</sup>Mbingo Hospital, Cameroon Baptist Convention Health Services, Mbingo, NW, Cameroon  
13

14 <sup>3</sup>Department of Obstetrics and Gynecology, McMaster University, Hamilton, Canada  
15

16 <sup>4</sup>Information and Vocational Orientation Centre, Bamenda  
17

18 <sup>5</sup>Department of Public Health, Faculty of Medicine and Biomedical Sciences, University of Yaounde,  
19 Cameroon  
20

21 <sup>6</sup>School of Health Studies, Western University, London, Canada  
22  
23  
24  
25  
26  
27

28 Corresponding Author: Lorraine Elit  
29

30 Affiliations: Baptist Health Institute of Science, Mbingo, NW Cameroon  
31

32 Mbingo Hospital, Cameroon Baptist Convention Health Services, Mbingo, NW,  
33 Cameroon  
34

35 Department of Obstetrics and Gynecology, McMaster University, Hamilton, Canada  
36

37 Email: elitl@mcmaster.ca  
38  
39  
40  
41  
42  
43  
44  
45  
46  
47  
48  
49  
50  
51  
52  
53  
54  
55  
56  
57  
58  
59  
60

## ABSTRACT

**Introduction:** Despite HPV vaccine being incorporated in the National Immunization Program in Cameroon in 2019, HPV vaccine uptake among eligible girls has been poor (5%). The barriers to HPV vaccination in this high-burden setting have not been previously studied, especially in rural areas. We propose to evaluate the knowledge, attitudes and beliefs of parents of girls aged 9 to 14 years regarding HPV vaccine.

### **Methods and Analysis:**

*Study design:* A qualitative descriptive study will be conducted using one-on-one semi structured interviews with parents of girls aged 9-14-year-old from 3 health districts in Cameroon (Mbingo, Njinikom and Fundong) who can converse in English or Pidgeon English. Enrolment will occur until thematic saturation – like 40 participants.

*Analysis:* Quantitative methods will be used to describe the interviewees. All interviews will be audio recorded, transcribed and loaded into ATLAS.ti. Transcripts will be coded and thematic analysis will be conducted. Analysis will occur concurrent with interviews.

### **Ethics and Dissemination:**

*Ethics:* Institutional review board approval will be obtained from the Cameroon Baptist Convention Health Board (CBCHB), Cameroon and McMaster University, Hamilton, Canada.

*Dissemination:* Study findings will be presented via a report and webinar to the Ministry of Health, the funders, the CBCHB and in person to healthcare providers and interested members of the general population in the study region. Plans are to share findings internationally through peer reviewed publication(s) and presentation(s).

Key words: HPV vaccine, Knowledge, Attitudes and Beliefs

### **Limitations**

-During the conduct of the study, NW Cameroon is in the midst of civil conflict. This limits the methods available for recruitment and potential willingness of parents to attend the interviews

### **Strengths**

-Rigorously developed protocol will be implemented by a research team that has experience with qualitative methods and analysis.

-5 of the 6 researchers reside in Cameroon with 4 of them residing between Mbingo and Bamenda. Mbingo is the site for the interviews. This is important as it facilitates understanding of the anthropologic nuances of the Kom people in this region.

- The conflict has been ongoing in this region since 2018. This study will reflect the impact of long lasting civil unrest on access to knowledge about and access to preventative strategies against cancer.

## INTRODUCTION

1  
2  
3 Infection with the Human Papilloma Virus (HPV) is an important public health problem given that HPV is  
4 the major cause of preinvasive disease and/or cancer of the lower genital tract and/or oral cavity [1,2].  
5 The introduction of HPV vaccines prior to exposure to the virus has been shown to play a major role in  
6 lowering disease burden associated with the oncologic types of this virus. The problem is that HPV  
7 vaccination uptake is still low in several countries [3,4]. At least 179 countries have implemented various  
8 HPV National Immunization Programs (NIP). Currently HPV vaccination coverage stands at 30% in low  
9 and low middle-income countries, 55% in upper middle-income countries and 80% in high income  
10 countries [4,5]. In Cameroon, a West African Country, reports from the Ministry of Health indicate a  
11 lower HPV vaccination rate, with only 5% of eligible girls having received the vaccine in 2020 [6]. Several  
12 factors may contribute to this low uptake: lack of knowledge or awareness of health care providers and  
13 the general population [7] and low acceptance of this vaccine among parents, guardians and  
14 adolescents themselves [8].  
15  
16  
17

18 In Africa, cervical cancer is the second leading cause of cancer mortality in women [7]. According to  
19 GLOBOCAN, 2020, the age standardized incidence and mortality rate of cervical cancer in Western  
20 African countries including Cameroon is 33.7 per 100,000 and 16.6 per 100,000 respectively [5,9]. The  
21 World Health Organization (WHO) has proposed a 90-70-90 cervical cancer reduction goal by 2030. This  
22 envisions achieving a 90% world vaccination rate for all girls by age 15 years, screening 70% of women at  
23 age 35 and again at 45-year-old by a high-performance test, and delivering appropriate treatment to  
24 90% of those with disease [10]. The global goal is a cervical cancer incidence rate of <4 per 100,000.  
25 Unfortunately, there is a paucity of population-based cancer statistics in much of the world, including  
26 Cameroon. Currently Cameroon reports cervical cancer as the second most common of all cancers  
27 (representing 13.8% of all cancer diagnoses) [11]. Cervical screening uptake is very low with just 4% of  
28 women having access to screening services [12,13].  
29  
30  
31

32 There have been two previous pay for HPV vaccination projects in Cameroon. In 2009, the National  
33 Committee for the Fight Against Cancer approved the use of Gardasil in Cameroon for the vaccination of  
34 girls aged 9 to 26 years (though emphasis was made on girls aged 9 to 13 years) [14,15]. As a result, the  
35 Cameroon Baptist Convention Health Services (CBCHS), a large faith-based private health services  
36 organization in Cameroon, vaccinated 6,851 girls from 2010-2012 [15]. There was a fee to cover  
37 administration of the doses (\$8USD/dose). Uptake was highest in the north and south west regions but  
38 poor in Yaoundé. Eighty-five percent of girls received all three doses. In 2017, the Cervarix vaccine (a  
39 bivalent vaccine produced by GlaxoSmithKline (GSK) against HPV 16,18) was approved for use in  
40 Cameroon by the Ministry of Health [14]. This pay for vaccine was used for Cameroonian women aged 9  
41 through 55. Results of this opportunity in terms of number of Cervarix doses administered or number of  
42 cycles completed are not available.  
43  
44  
45

46 In 2019, Gardasil 4 was incorporated into the national (EPI) vaccine program for Cameroon but there has  
47 been poor communication concerning availability of doses both to health care providers and the  
48 community [9,16]. In North West Cameroon, while there is supply of free Gardasil 4 for girls aged 9-14-  
49 year-old, the 2021 supply expired before use. Despite CBCHS campaigns to promote vaccination against  
50 HPV related diseases, the uptake of the HPV vaccination has been low in Cameroon. There exists no  
51 evidence-based explanation for this low uptake for the Cameroonian context.  
52  
53

54 Our hypothesis is that the uptake of the HPV vaccine depends on the public's comprehension of  
55 implications of an HPV infection and their understanding of the benefits of the HPV vaccine in  
56  
57  
58  
59

1  
2  
3 preventing lower genital tract and oral cancer [17]. The aim of this study is to assess knowledge, beliefs  
4 and attitudes of parents of young girls aged 9 to 14 years about HPV vaccines within some rural  
5 communities in the North West Region of Cameroon served by three well attended hospitals. These are  
6 Mbingo Baptist Hospital, St Martin de Porres Catholic Hospital Njinikom and Fundong District Hospital.  
7 We wish to understand from a public perspective the reasons for this low uptake. While there are many  
8 stakeholders involved in the process of HPV vaccination (like Ministry of Health, Ministry of Education,  
9 Hospitals, Pharmaceutical companies, Schools, community leaders (like Fons, Chiefs, quarter heads,  
10 pastors, public, girls aged 9-14yo), understanding the perspectives of parents with girls aged 9-14yo who  
11 may or may not provide consent for vaccination is essential to improve HPV vaccine uptake. The above  
12 listed hospitals have been conducting activities related to primary prevention (vaccination) since as early  
13 as 2016 and secondary prevention (screening) for cervical cancer since 2007. We also know that  
14 communities served by these hospitals are in the region in which CBCHS organizes HPV vaccine  
15 promotion campaigns. While these sites are in a zone of conflict, the area has been more stable in the  
16 recent 2 years as compared to 2018. We recognize the presence of COVID in the region since March  
17 2020 with COVID vaccinations for health workers and the public being available as of April 2021.  
18  
19  
20  
21

22 The aim of this study is to assess knowledge, beliefs and attitudes of parents to young girls aged 9 to 14  
23 years about HPV vaccines within some rural communities in the North West Region of Cameroon served  
24 by three hospitals in that area. The specific objectives of this evaluation are: To evaluate the knowledge,  
25 beliefs and attitudes of parents of young girls aged 9 to 14 years regarding the vaccine. To obtain  
26 learning on possible intervention to improve acceptance of HPV vaccine by parents of young girls aged 9  
27 to 14 years in the area of study.  
28  
29  
30  
31

## 32 **METHODS**

33 This is a qualitative descriptive study as described by Sandelowski [1],8 which is a suitable method for  
34 advancing understanding of questions related to health care seeking. The Theoretical framework of  
35 acceptability (TFA) will serve as a guide for this study [19]. The TFA provides a reflection of how much  
36 healthcare interventions are considered appropriate by providers and receivers based on real or  
37 perceived understanding and emotional implications of the intervention. The TFA assesses acceptability  
38 of interventions by looking at seven domains which include perceived effectiveness, burden, affective  
39 attitude, intervention coherence, self-efficacy, ethicality and opportunity cost.  
40  
41  
42

43 This study involves the collection and analysis of approximately 40 one-on-one semi-structured  
44 interviews with parent(s) of one or more female children (ages 9-14 years) living in rural communities in  
45 North West Cameroon. More specifically they live within Fundong, Njinikom or Mbingo health areas.  
46 Interviews are being conducted between January and November 2022.  
47

48 Sampling will involve a quota sampling method for parent(s) consent to participate in the interviews.  
49 Given a study objective is to clarify motivations driving HPV vaccination or its avoidance in this district,  
50 sampling will include purposively seeking a balance between parents who have at the time of interview  
51 opted in or out of HPV vaccination for their girl(s) with maximum variation (e.g., level of parental  
52 education, occupation). We will include up to 10 parents of girls who received HPV vaccine and 30 parents  
53 of girls who did not receive the HPV vaccine. Potential parent participants will be identified from HPV  
54 vaccination registry at the Mbingo Baptist Hospital women's health program office (for girls who received  
55  
56  
57  
58  
59  
60

1  
2  
3 the vaccine). Regarding families who did not receive the vaccine, potential parent participants will be  
4 those who respond to word-of-mouth advertisements by health area community mobilizers  
5

6 To be invited for an interview, the individual must be a parent of a daughter aged 9 to 14 years living in  
7 Mbingo, Njinikom and Fundong health areas. Individuals will be excluded if they are a health workers or  
8 working in any health institution. It is our assumption that the knowledge, attitudes and beliefs of health  
9 care worker differ from those of the general public. This study is focused on advancing understanding of  
10 these from a public perspective as they pertain to HPV vaccination. Other exclusion criteria include  
11 unwillingness to provide consent to participate, inability to converse in the language of the interviewer  
12 (English or Pidgin English). Pidgin English otherwise known as Cameroonian Creole or Kamtok is spoken in  
13 the North and South West regions of Cameroon that are primarily English speaking. Enrolment will be  
14 continued until we reach thematic saturation (i.e, the point when new data does not add new thematic  
15 information to what has been learned from completed interviews).  
16  
17

18  
19 All parents who agree to participate in the study will be invited to Mbingo Baptist Hospital at a date and  
20 time convenient to them for the interview with the research interviewer. Interviews will be conducted  
21 by a medical anthropologist with post-graduate training in qualitative research. Parents will be  
22 reimbursed for the transportation and feeding costs. They will also receive a small stipend of soap.  
23

24 An interview guide has been created addressing knowledge, attitudes and behaviors toward vaccination  
25 in general, sexually transmitted diseases, cervical cancer, and HPV vaccination. The guide contains open  
26 ended questions with probes. The guide will be pilot tested with 5 parents for comprehension and flow.  
27 All interviews will be done in either English, or pidgin English. The interviews will last between 45 to 60  
28 minutes and will be audio recorded. The interviewer will use an electronic tablet with recording  
29 application. All the interviews will be transcribed into English. All recorded audio files will be saved on  
30 password-protected computers and backed up on to Mbingo Baptist Hospital servers. Only study  
31 investigators and the interviewer will have access to the saved files.  
32  
33

34  
35 *Patient and Public Involvement:* This study is designed to foreground the voices of parents approached  
36 for consent to have their daughters' vaccinated within Cameroon's National Vaccination Program.  
37 Cameroonian healthcare professionals familiar with the study region, and ultimately responsible for  
38 vaccination in the region supported the design and recruitment strategies. Member checking will be  
39 conducted using a focus group within the community to discuss themes identified in the individual  
40 interviews.  
41  
42  
43

#### 44 **ANALYSIS**

45  
46 Data will be analyzed concurrently with the interviews. A four step thematic content analysis will be  
47 conducted including data familiarization, theme identification, data coding and organization of codes  
48 and themes using the framework method. Through an iterative process, transcripts will be coded and  
49 analyzed for description and interpretive themes. All transcribed interviews will be inputted into ATLAS  
50 Ti. Two study personnel (CN, GMA) will code each of the first 2 interviews, with the goal of identifying  
51 key beliefs and attitudes that could clarify a participant's or wider society hesitancy to seek out HPV  
52 vaccination. Codes will be compared and discrepancies resolved in dialogue with the study co-leads (LE,  
53 JFD, EN). Sequential groups of 2 interviews will be double coded until agreement is achieved. Thereafter,  
54 an interview will only need to be coded by one member of the study team. An individual external to the  
55  
56  
57  
58  
59  
60

1  
2  
3 team (EH) will conduct an audit coding of all the coded content once all the interviews have been coded,  
4 towards verifying the accuracy and coherence of the coding process. The research team will meet to  
5 discuss and reach consensus on the themes identified and their implications in relation to the study  
6 question.  
7  
8  
9

## 10 **ETHICS**

11  
12 Institutional Ethics approval has been obtained both in Canada at McMaster University and through the  
13 Cameroon Baptist Convention Health Board. Participant information and informed consent documents  
14 will be read and explained to potential participants prior to participating in the interviews. The consent  
15 describes in detail the study intervention, study procedures, benefits, risks, compensation, voluntary  
16 participation, confidentiality, right as a participant and ability to withdraw from the study. Those who  
17 opt into the study will be asked to sign the consent form. A copy of the signed informed consent  
18 document will be stored in the participant's research record and another signed copy retained by the  
19 consenting participant. Consent forms will be kept separate from the data collected and no identifying  
20 information will be included in the transcription of the interview.  
21  
22  
23

24 Any information that is obtained during this study will be kept confidential. All participant information  
25 will have a research code number (and no personal identifying information). These documents will be  
26 stored in encrypted and password-protected computer files. Only the PI and other investigators will  
27 have access. These files will be backed up at Mbingo Baptist Hospital secure servers. The identifiers and  
28 other data will be destroyed 7 years after study completion.  
29

30 Direct benefits to study participants are unlikely; however, information garnered from this study will be  
31 used to determine the knowledge, beliefs and attitudes of parents of young girls aged 9 to 14 years  
32 regarding the HPV vaccine and identify possible interventions to improve acceptance of HPV vaccine by  
33 parents of young girls aged 9 to 14 years in the area of study.  
34  
35

36 We anticipate minimal risks for participants in this study. A few risks will involve traveling up to about  
37 30Km to Mbingo Baptist Hospital for the interviews. There has been a waxing and waning civil conflict in  
38 this region since 2018. If in the opinion of local hospital administration and/or Cameroon Baptist  
39 Convention Health Services (CBCHS) that people should not travel to the hospital on a given day, the  
40 interviews will be cancelled that day and/or the study will be put on hold. Other risks include the  
41 possible discomfort in expressing personal perceptions in response to some interview questions. To  
42 mitigate these, interviews will be arranged for dates and times that are suitable for the participants and  
43 participants shall be informed prior to the start of interviews not to provide names or personal  
44 identifiers on recordings.  
45  
46  
47

48 Participants will be free to withdraw from the study at any time upon request. If they choose to leave the  
49 study after data has been collected, they will be able to request a withdrawal of collected information.  
50 If the study is prematurely terminated or suspended, the PI will promptly inform the Research Ethics  
51 Committee at McMaster University and the Cameroon Baptist Convention Health Board and the study  
52 sponsors and funders (Merck), providing the reason(s) for the termination or suspension. Any  
53 amendment to the protocol will be submitted to various ethics committees before the changes are  
54 implemented to the study.  
55  
56  
57  
58  
59  
60



1  
2  
3 The PI and study team will conduct the study in compliance with the approved protocol. The PI and  
4 study team will not implement any deviation from or changes to the protocol without prior review and  
5 documented approval from the Ethics Committee. Any unintentional deviations from the protocol will  
6 be reported to the Ethics Committee.  
7  
8  
9

## 10 **EXPECTED OUTCOMES AND DISSEMINATION**

11  
12 At the end of this study we hope to better understand the perspective of parents and their knowledge,  
13 attitudes and beliefs about HPV vaccinations for their young daughters. This is the first study of its kind  
14 in rural communities in the North West Region, Cameroon. This information will help us understand if  
15 there are knowledge gaps that could be addressed through education, or negative attitudes that could  
16 be challenged through peer communication. We anticipate this project could serve as a stepping stone  
17 to similar projects in other regions of Cameroon or intervention projects based on the findings of this  
18 study. Results will be disseminated to the funders, to CBCHB, Cameroon Ministry of Health and  
19 interested parties like the EPI vaccine program. Presentation locally at the internal medicine and surgery  
20 residents of the Baptist Institute of Health Sciences is anticipated. A peer review publication and  
21 presentation at peer reviewed meeting(s) are planned.  
22  
23  
24  
25  
26

## 27 **AUTHORS' CONTRIBUTIONS**

28  
29 Elit- the research team leader and writing of the protocol

30  
31 Ngalla-provided feasibility and cultural input into recruitment and design of the interview guide

32  
33 Afungchwi – provided feasibility and cultural insight into recruitment, design of the interview guide and  
34 analysis

35  
36 Tum-provided cultural input into recruitment and design and reiterations of the interview guide

37  
38 Folkom-Domgue- provided input into the background, rationale and cultural insight into recruitment  
39 and design of the interview guide

40  
41 Nouvet – provided input into the background and rationale, methods and analysis  
42  
43

## 44 **COMPETING INTERESTS STATEMENT**

45  
46 This is an investigator initiated research project which has been funded by Merck. Merck does not have  
47 access to any of the original material but will be provided with any manuscripts that result from this  
48 work for review prior to publication.  
49  
50

## 51 **FUNDING STATEMENT**

52  
53  
54  
55  
56  
57  
58  
59  
60

This work was supported by Merck grant number 100035 (Elit 13Oct2021). Merck had no role in the study design, implementation, data collection. Interpretation and dissemination of the findings of this study.

## REFERENCES

1. De Martel C, Georges D, Bray F, et al. Global burden of cancer attributable to infections in 2018: A worldwide incidence analysis. *Lancet Glob. Health.* 2020;8:e180-90.
2. Arbyn M, Weiderpass E, Bruni L, et al. Estimates of incidence and mortality of cervical cancer in 2018: A worldwide analysis. *Lancet Glob. Health.* 2020;8:e191–e203.
3. Lei J, Ploner A, Elfström KM, et al. HPV vaccination and the risk of invasive cervical cancer. *N. Engl. J. Med.* 2020;383:1340–8.
4. PATH Global HPV vaccine introduction overview. <https://www.path.org/resources/global-hpv-vaccine-introduction-overview/> (2019), Accessed Feb 2020.
5. Lemp JM, De Neve JW, Bussmann H, et al. Lifetime prevalence of cervical cancer screening in 55 low- and middle-income countries. *JAMA.* 2020;324:1532-42.
6. HPV Facts. 2021 for Cameroon ICO/IARC Information Centre on HPV and Cancer <https://hpvcentre.net/statistics/reports/CMR.pdf> Accessed 14Feb2022.
7. WHO. (2010). WHO/ICO Information Centre on HPV and Cervical Cancer (HPV Information Centre). Human Papillomavirus and Related Cancers in Cameroon. Summary Report 2010. [www.who.int/hpvcentre](http://www.who.int/hpvcentre). Accessed 28 Aug 2011.
8. Shelton RC, Snaveley AC, De Jesus M, et al. HPV vaccine decision-making and acceptance: does religion play a role? *J Relig Health.* 2013;52(4):1120–30.
9. 2020 Cameroon country data. [www.who.int](http://www.who.int). Accessed 16 Feb2022.
10. Global strategy to accelerate the elimination of Cervical cancer. 17Nov2020. [www.who.int](http://www.who.int) Accessed 21Feb2022.
11. Enow Orock GE, Ndom P, Doh AS, 2012. Current cancer incidence and trends in Yaounde, Cameroon. *Oncol Gastroenterol Hepatol Reports*, 1(1), pp.58-63.
12. World Health Organization. (2002). Cervical cancer screening in developing countries: Report of a WHO consultation. Geneva: World Health Organization.
13. Okyere J, Duodu PA, Aduse-Poku L, et al. Cervical cancer screening prevalence and its correlates in Cameroon. Secondary data analysis of the 2018 demographic and health survey. *BMC Public Health* 2021;21;1071-9.
14. Wamai RG, Ayissi CA, Oduwo GO, et al. Assessing the effectiveness of a community-based sensitization strategy in creating awareness about HPV, cervical cancer and HPV vaccine among parents in North West Cameroon. *Journal of Community Health* 2012;37(5):917-26.
15. Ogembo JG, Manga S, Nulah K, et al. Achieving high uptake of HPV vaccine in Cameroon: Lessons learned in overcoming challenges. *Vaccine* 2014;32(35):4399-403.
16. <https://www.journalducameroun.com/en/cameroonnationwide-vaccination-against-cervical-cancer-to-begin-soon> Accessed Apr 15, 2021.
17. Marlow LA, Waller J, Wardle J. Public awareness that HPV is a risk factor for cervical cancer. *Br J Cancer.* 2007;97(5):691–4.
18. Sandelowski M. Whatever happened to qualitative description? *Research in Nursing and health* 2000;23(4):334-40.
19. Sekhon M, Cartwright M, Francis JJ. Acceptability of healthcare interventions: an overview of reviews and development of a theoretical framework. *BMC Health Services Research.* 2017;17:88.

1  
2  
3  
4  
5  
6  
7  
8  
9  
10  
11  
12  
13  
14  
15  
16  
17  
18  
19  
20  
21  
22  
23  
24  
25  
26  
27  
28  
29  
30  
31  
32  
33  
34  
35  
36  
37  
38  
39  
40  
41  
42  
43  
44  
45  
46  
47  
48  
49  
50  
51  
52  
53  
54  
55  
56  
57  
58  
59  
60

WORD COUNT 2969

For peer review only

# BMJ Open

## Study protocol for assessing knowledge, attitudes and belief toward HPV vaccination of parents with children aged 9-14 years in rural communities of North West Cameroon: a qualitative study

|                                 |                                                                                                                                                                                                                                                                                                                                                                                                                                                                                        |
|---------------------------------|----------------------------------------------------------------------------------------------------------------------------------------------------------------------------------------------------------------------------------------------------------------------------------------------------------------------------------------------------------------------------------------------------------------------------------------------------------------------------------------|
| Journal:                        | <i>BMJ Open</i>                                                                                                                                                                                                                                                                                                                                                                                                                                                                        |
| Manuscript ID                   | bmjopen-2022-062556.R1                                                                                                                                                                                                                                                                                                                                                                                                                                                                 |
| Article Type:                   | Protocol                                                                                                                                                                                                                                                                                                                                                                                                                                                                               |
| Date Submitted by the Author:   | 18-Jul-2022                                                                                                                                                                                                                                                                                                                                                                                                                                                                            |
| Complete List of Authors:       | Elit, Lorraine; Baptist Institute for Health Sciences; McMaster University Ngalla, Calvin; Mbingo Hospital, Women's Health Program Afugchwi, Glen; Baptist Institute for Health Science, Pediatric Oncology Tum, Eric; Information and Vocational Orientation Centre Fokom-Domgue, Joël; Faculty of Medicine and Biomedical Sciences, University of Yaoundé I, Yaoundé, Cameroon, Department of Obstetrics and Gynecology Nouvet, Elysée; Western University, School of Health Studies |
| <b>Primary Subject Heading</b>: | Qualitative research                                                                                                                                                                                                                                                                                                                                                                                                                                                                   |
| Secondary Subject Heading:      | Public health                                                                                                                                                                                                                                                                                                                                                                                                                                                                          |
| Keywords:                       | INFECTIOUS DISEASES, Public health < INFECTIOUS DISEASES, PUBLIC HEALTH                                                                                                                                                                                                                                                                                                                                                                                                                |
|                                 |                                                                                                                                                                                                                                                                                                                                                                                                                                                                                        |

SCHOLARONE™  
Manuscripts

1  
2  
3 1 Title: Study protocol for assessing knowledge, attitudes and belief toward HPV vaccination of parents  
4 2 with children aged 9-14 years in rural communities of North West Cameroon: a qualitative study

5  
6 3 <sup>1,2,3</sup> Elit L, <sup>2</sup>Ngalla C, <sup>2</sup>Afungchwi GM, <sup>4</sup>Tum E, <sup>5</sup>Fokom-Domgue J, <sup>6</sup>Nouvet E.

7  
8 4 Affiliations

9  
10 5 <sup>1</sup>Baptist Health Institute of Science, Mbingo, NW Cameroon

11  
12 6 <sup>2</sup>Mbingo Hospital, Cameroon Baptist Convention Health Services, Mbingo, NW, Cameroon

13  
14 7 <sup>3</sup>Department of Obstetrics and Gynecology, McMaster University, Hamilton, Canada

15  
16 8 <sup>4</sup>Information and Vocational Orientation Centre, Bamenda

17  
18 9 <sup>5</sup>Department of Public Health, Faculty of Medicine and Biomedical Sciences, University of Yaounde,  
19 10 Cameroon

20  
21 11 <sup>6</sup>School of Health Studies, Western University, London, Canada

22  
23 12

24  
25 13

26  
27 14

28 15 Corresponding Author: Lorraine Elit

29  
30 16 Affiliations: Baptist Health Institute of Science, Mbingo, NW Cameroon

31  
32 17 Mbingo Hospital, Cameroon Baptist Convention Health Services, Mbingo, NW,  
33 18 Cameroon

34  
35 19 Department of Obstetrics and Gynecology, McMaster University, Hamilton, Canada

36  
37 20 Email: elitl@mcmaster.ca

38  
39 21

40  
41 22

42

43

44

45

46

47

48

49

50

51

52

53

54

55

56

57

58

59

60

## 23 ABSTRACT

24 **Introduction:** Despite HPV vaccine being incorporated in the National Immunization Program in  
25 Cameroon in 2019, HPV vaccine uptake among eligible girls has been poor (5%). The barriers to HPV  
26 vaccination in this high-burden setting have not been previously studied, especially in rural areas. We  
27 propose to evaluate the knowledge, attitudes and beliefs of parents of girls aged 9 to 14 years regarding  
28 HPV vaccine.

### 29 **Methods and Analysis:**

30 *Study design:* A qualitative descriptive study will be conducted using one-on-one semi structured  
31 interviews with parents of girls aged 9-14-year-old from 3 health districts in Cameroon (Mbingo,  
32 Njinikom and Fundong) who can converse in English or Pidgeon English. Enrolment will occur until  
33 thematic saturation – approximately 40 participants.

34 *Analysis:* Quantitative methods will be used to describe the interviewees. All interviews will be audio  
35 recorded, transcribed, and loaded into a tool to facilitate analysis (ATLAS.ti). Transcripts will be coded  
36 and thematic analysis will be conducted. Analysis will occur concurrent with interviews.

### 37 **Ethics and Dissemination:**

38 *Ethics:* Institutional review board approval will be obtained from the Cameroon Baptist Convention  
39 Health Board (CBCHB), Cameroon and McMaster University, Hamilton, Canada.

40 *Dissemination:* Study findings will be presented via a report and webinar to the Ministry of Health, the  
41 funders, the CBCHB and in person to healthcare providers and interested members of the general  
42 population in the study region. Plans are to share findings internationally through peer reviewed  
43 publication(s) and presentation(s).

44 Key words: HPV vaccine, Knowledge, Attitudes and Beliefs

### 45 **Strengths**

46 -The interview guide was developed and will be implemented by a predominantly Cameroon research  
47 team that has experience with medical anthropology, qualitative methods and analysis.

48 -Analysis will be conducted by a predominantly Cameroon research team who has understanding of the  
49 anthropologic nuances of the Kom people residing in this region.

### 50 **Limitations**

51 -Cameroon is a unique country setting and the region where the study was conducted is in a conflict  
52 zone; this may limit generalizability of findings.

53 -This study is limited to the perceptions of one group of key decision-makers in vaccination in the region:  
54 those of parents.

55

## 56 **INTRODUCTION**

1  
2  
3 57 Infection with the Human Papilloma Virus (HPV) is an important public health problem given that HPV is  
4 58 the major cause of preinvasive disease and/or cancer of the lower genital tract and/or oral cavity [1,2].  
5 59 The introduction of HPV vaccines prior to exposure to the virus has been shown to play a major role in  
6 60 lowering disease burden associated with the oncologic types of this virus. The problem is that HPV  
7 61 vaccination uptake is still low in several countries [3,4]. At least 179 countries have implemented various  
8 62 HPV National Immunization Programs (NIP). Currently HPV vaccination coverage stands at 30% in low  
9 63 and low middle-income countries, 55% in upper middle-income countries and 80% in high income  
10 64 countries [4,5]. In Cameroon, a West African Country, reports from the Ministry of Health indicate a  
11 65 lower HPV vaccination rate, with only 5% of eligible girls having received the vaccine in 2020 [6]. This is  
12 66 lower than reports for other childhood vaccinations like measles (8%) [7] and in Fouban (neighboring  
13 67 province), 28.6% for BCG, 22.8% for DPT-Hi+Hb3 and 14.3% for measles/rubella [8]. Several factors may  
14 68 contribute to this low uptake: lack of knowledge or awareness of health care providers and the general  
15 69 population [9] and low acceptance of this vaccine among parents, guardians and adolescents themselves  
16 70 [10].

20  
21 71 In Africa, cervical cancer is the second leading cause of cancer mortality in women [9]. According to  
22 72 GLOBOCAN, 2020, the age standardized incidence and mortality rate of cervical cancer in Western  
23 73 African countries including Cameroon is 33.7 per 100,000 and 16.6 per 100,000 respectively [5,11].  
24 74 While other HPV related cancers include oro-pharyngeal (ASI/ASM per 100,000 is 2.21/1.55 (men),  
25 75 0.38/0.14 (women)), anal (0.62/0.46 (men), 0.70/0.49 (women)), and other male or female lower genital  
26 76 tract sites (0.67/0.44 (vulva), 0.63/0.38 (vaginal), 0.14/0.06 (penile)), disease specific incidence and  
27 77 mortality rates appear low in part due to a lack of systematic cancer reporting in Cameroon [6]. The  
28 78 World Health Organization (WHO) has proposed a 90-70-90 cervical cancer reduction goal by 2030. This  
29 79 envisions achieving a 90% world vaccination rate for all girls by age 15 years, screening 70% of women at  
30 80 age 35 and again at 45-year-old by a high-performance test and delivering appropriate treatment to 90%  
31 81 of those with disease [12]. The global goal is a cervical cancer incidence rate of <4 per 100,000.  
32 82 Unfortunately, there is a paucity of population-based cancer statistics in much of the world, including  
33 83 Cameroon. Currently Cameroon reports cervical cancer as the second most common of all cancers  
34 84 (representing 13.8% of all cancer diagnoses) [13]. Cervical screening uptake is very low with just 4% of  
35 85 women having access to screening services [14,15].

39  
40 86 There have been two previous pay for HPV vaccination projects in Cameroon. In 2009, the National  
41 87 Committee for the Fight Against Cancer approved the use of Gardasil in Cameroon for the vaccination of  
42 88 girls aged 9 to 26 years (though emphasis was made on girls aged 9 to 13 years) [16,17]. As a result, the  
43 89 Cameroon Baptist Convention Health Services (CBCHS), a large faith-based private health services  
44 90 organization in Cameroon, vaccinated 6,851 girls from 2010-2012 [17]. There was a fee to cover  
45 91 administration of the doses (\$8USD/dose). Uptake was highest in the north and south west regions but  
46 92 poor in Yaoundé. Eighty-five percent of girls received all three doses. In 2017, the Cervarix vaccine (a  
47 93 bivalent vaccine produced by GlaxoSmithKline (GSK) against HPV 16,18 was approved for use in  
48 94 Cameroon by the Ministry of Health [16]. This pay for vaccine was used for Cameroonian women aged 9  
49 95 through 55. Results of this opportunity in terms of number of Cervarix doses administered or number of  
50 96 cycles completed are not available.

53  
54 97 In 2019, Gardasil 4 was incorporated into the national (EPI) vaccine program for Cameroon for girls age 9  
55 98 years old. There has been poor communication concerning availability of doses both to health care  
56 99 providers and the community [11,18]. In North West Cameroon, the CBCHS has made a supply of free

1  
2  
3 100 Gardasil 4 for girls aged 9-14-year-old, the 2021 supply expired before use. Despite CBCHS campaigns to  
4 101 promote vaccination against HPV related diseases, the uptake of the HPV vaccination has been low.  
5 102 There exists no evidence-based explanation for this low uptake for the Cameroonian context.

7 103 Parents conventionally play a key role in non-adults' healthcare decision-making in this part of  
8 104 Cameroon, thus our hypothesis is that the uptake of the HPV vaccine depends in part on the public's  
9 105 comprehension of implications of an HPV infection and their understanding of the benefits of the HPV  
10 106 vaccine in preventing lower genital tract and oral cancer [19]. The aim of this study is to assess  
11 107 knowledge, beliefs and attitudes of parents of young girls aged 9 to 14 years about HPV vaccines within  
12 108 some rural communities in the North West Region of Cameroon served by three well attended hospitals.  
13 109 These are Mbingo Baptist Hospital, St Martin de Porres Catholic Hospital Njinikom and Fundong District  
14 110 Hospital. We wish to understand from a public perspective the reasons for this low uptake. While there  
15 111 are many stakeholders involved in the process of HPV vaccination (like Ministry of Health, Ministry of  
16 112 Education, Hospitals, Pharmaceutical companies, Schools, community leaders (like Fons, Chiefs, quarter  
17 113 heads, pastors, public, girls aged 9-14yo), understanding the perspectives of parents with girls aged 9-  
18 114 14yo (who may or may not provide consent for vaccination) is essential to improve HPV vaccine uptake.  
19 115 The above listed hospitals have been conducting activities related to primary prevention (vaccination)  
20 116 since as early as 2016 and secondary prevention (screening) for cervical cancer since 2007. We also  
21 117 know that communities served by these hospitals are in the region in which CBCHS organizes HPV  
22 118 vaccine promotion campaigns. While these sites are in a zone of conflict, the area has been more stable  
23 119 in the recent 2 years as compared to 2018. We recognize the presence of COVID in the region since  
24 120 March 2020 with COVID vaccinations for health workers and the public being available as of April 2021.

25 121 The aim of this study is to assess knowledge, beliefs and attitudes of parents to young girls aged 9 to 14  
26 122 years about HPV vaccines within some rural communities in the North West Region of Cameroon served  
27 123 by three hospitals in that area. The specific objectives of this evaluation are: To evaluate the knowledge,  
28 124 beliefs and attitudes of parents of young girls aged 9 to 14 years regarding the vaccine. To obtain  
29 125 learning on possible intervention to improve acceptance of HPV vaccine by parents of young girls aged 9  
30 126 to 14 years in the area of study.

31  
32  
33  
34  
35  
36  
37  
38 127

## 39 128 **METHODS**

40 129 This is a qualitative descriptive study as described by Sandelowski [20] which is a suitable method for  
41 130 advancing understanding of questions related to health care seeking. The Theoretical framework of  
42 131 acceptability (TFA) will serve as a guide for this study [21]. The TFA provides a reflection of how much  
43 132 healthcare interventions are considered appropriate by providers and receivers based on real or  
44 133 perceived understanding and emotional implications of the intervention. The TFA assesses acceptability  
45 134 of interventions by looking at seven domains which include perceived effectiveness, burden, affective  
46 135 attitude, intervention coherence, self-efficacy, ethicality and opportunity cost.

47 136 This study involves the collection and analysis of approximately 40 one-on-one semi-structured  
48 137 interviews with parent(s) of one or more female children (ages 9-14 years) living in rural communities in  
49 138 North West Cameroon. More specifically they live within Fundong, Njinikom or Mbingo health areas.  
50 139 Interviews are being conducted between January and November 2022.



1  
2  
3 140 Sampling will involve a quota sampling method for parent(s) consent to participate in the interviews.  
4 141 Given a study objective is to clarify motivations driving HPV vaccination or its avoidance in this district,  
5 142 sampling will include purposively seeking a balance between parents who have at the time of interview  
6 143 opted in or out of HPV vaccination for their girl(s) with maximum variation (e.g., level of parental  
7 144 education, occupation). We will include up to 10 parents of girls who received HPV vaccine and 30 parents  
8 145 of girls who did not receive the HPV vaccine. Potential parent participants will be identified from HPV  
9 146 vaccination registry at the Mbingo Baptist Hospital women's health program office (for girls who received  
10 147 the vaccine). Regarding families who did not receive the vaccine, potential parent participants will be  
11 148 those who respond to word-of-mouth advertisements by health area community mobilizers  
12 149

13 150 To be invited for an interview, the individual must be a parent of a daughter aged 9 to 14 years living in  
14 151 Mbingo, Njinikom and Fundong health areas. Individuals will be excluded if they are a health worker or  
15 152 working in any health institution. It is our assumption that the knowledge, attitudes, and beliefs of health  
16 153 care worker differ from those of the general public. This study is focused on advancing understanding of  
17 154 these from a public perspective as they pertain to HPV vaccination. Other exclusion criteria include  
18 155 unwillingness to provide consent to participate, inability to converse in the language of the interviewer  
19 156 (English or Pidgin English). Pidgin English otherwise known as Cameroonian Creole or Kamtok is the main  
20 157 language spoken in the North and South West regions of Cameroon. There is a small percent of the  
21 158 population who only communicate in Fula. Also, an older segment of the population (beyond the age of  
22 159 the parents on whom we focus here) who have not been exposed to formal education may only speak  
23 160 their tribal language. We do not anticipate exclusion of these linguistic minorities impacting on our ability  
24 161 to recruit sufficient participants. Enrolment will be continued until we reach thematic saturation (i.e, the  
25 162 point when new data does not add new thematic information to what has been learned from completed  
26 163 interviews).  
27 164

28 165 All parents who agree to participate in the study will be invited to Mbingo Baptist Hospital at a date and  
29 166 time convenient to them for the interview with the interviewer. We understand that this may limit  
30 167 participation of some individuals but by allowing participants to dictate their preferred timing for the  
31 168 interview, by reimbursing transportation and meal costs and by offering a small token for their time (in  
32 169 the form of soap), we have tried to optimize participation. Interviews will be conducted by a medical  
33 170 anthropologist with post-graduate training in qualitative research.  
34

35 171 An interview guide has been created addressing knowledge, attitudes, and behaviors toward vaccination  
36 172 in general, sexually transmitted diseases, cervical cancer, and HPV vaccination (Supplementary Table).  
37 173 The guide contains open ended questions with probes. The guide will be pilot tested with 5 parents for  
38 174 comprehension and flow. The interviews will last between 45 to 60 minutes and will be audio recorded.  
39 175 The interviewer will use an electronic tablet with recording application. All the interviews will be  
40 176 verbatim transcribed into English. All recorded audio files will be saved on password-protected  
41 177 computers and backed up on to Mbingo Baptist Hospital servers. Only study investigators and the  
42 178 interviewer will have access to the saved files.

43 179 *Patient and Public Involvement:* This study is designed to foreground the voices of parents approached  
44 180 for consent to have their daughters' vaccinated within Cameroon's National Vaccination Program.  
45 181 Cameroonian healthcare professionals familiar with the study region, and ultimately responsible for  
46 182 vaccination in the region supported the design and recruitment strategies. Member checking will be  
47 183 conducted using a focus group within the community to discuss themes identified in the individual  
48 184 interviews.

185

**186 ANALYSIS**

187 Data will be analyzed concurrently with the interviews. A four step thematic content analysis will be  
188 conducted including data familiarization, theme identification, data coding and organization of codes  
189 and themes using the framework method. Through an iterative process, transcripts will be coded and  
190 analyzed for description and interpretive themes. All transcribed interviews will be inputted into ATLAS  
191 ti9, a program widely used by social scientists to facilitate organization and analysis of qualitative data.  
192 Two study personnel (CN, GMA) will code each of the first 2 interviews, with the goal of identifying key  
193 beliefs and attitudes that could clarify a participant's or wider society hesitancy to seek out HPV  
194 vaccination. Codes will be compared and discrepancies resolved in dialogue with the study co-leads (LE,  
195 JFD, EN). Sequential groups of 2 interviews will be double coded until agreement is achieved. Thereafter,  
196 an interview will only need to be coded by one member of the study team. An individual external to the  
197 team (EH) will conduct an audit coding of all the coded content once all the interviews have been coded,  
198 towards verifying the accuracy and coherence of the coding process. The research team will meet  
199 regularly to discuss and reach consensus on the themes identified and their implications in relation to  
200 the study question.

201

**202 ETHICS AND DISEMINATION**

203 Institutional Ethics approval has been obtained both in Canada at McMaster University and through the  
204 Cameroon Baptist Convention Health Board. Participant information and informed consent documents  
205 will be read and explained to potential participants prior to participating in the interviews. The consent  
206 describes in detail the study intervention, study procedures, benefits, risks, compensation, voluntary  
207 participation, confidentiality, right as a participant and ability to withdraw from the study. Those who  
208 opt into the study will be asked to sign the consent form. A copy of the signed informed consent  
209 document will be stored in the participant's research record and another signed copy retained by the  
210 consenting participant. Consent forms will be kept separate from the data collected and no identifying  
211 information will be included in the transcription of the interview.

212 Any information that is obtained during this study will be kept confidential. All participant information  
213 will have a research code number (and no personal identifying information). These documents will be  
214 stored in encrypted and password-protected computer files. Only the PI and other investigators will  
215 have access. These files will be backed up at Mbingo Baptist Hospital secure servers. The identifiers and  
216 other data will be destroyed 7 years after study completion.

217 Direct benefits to study participants are unlikely; however, information garnered from this study will be  
218 used to determine the knowledge, beliefs and attitudes of parents of young girls aged 9 to 14 years  
219 regarding the HPV vaccine and identify possible interventions to improve acceptance of HPV vaccine by  
220 parents of young girls aged 9 to 14 years in the area of study.

221

222 We anticipate minimal risks for participants in this study. A few risks will involve traveling up to about  
223 30Km to Mbingo Baptist Hospital for the interviews. There has been a waxing and waning civil conflict in  
224 this region since 2018. If in the opinion of local hospital administration and/or Cameroon Baptist  
225 Convention Health Services (CBCHS) that people should not travel to the hospital on a given day, the

226 interviews will be cancelled that day and/or the study will be put on hold. Other risks include the  
227 possible discomfort in expressing personal perceptions in response to some interview questions. To  
228 mitigate these, interviews will be arranged for dates and times that are suitable for the participants and  
229 participants shall be informed prior to the start of interviews not to provide names or personal  
230 identifiers on recordings.

231 Participants will be free to withdraw from the study at any time upon request. If they choose to leave the  
232 study after data has been collected, they will be able to request a withdrawal of collected information.  
233 If the study is prematurely terminated or suspended, the PI will promptly inform the Research Ethics  
234 Committee at McMaster University and the Cameroon Baptist Convention Health Board and the study  
235 sponsors and funders (Merck), providing the reason(s) for the termination or suspension. Any  
236 amendment to the protocol will be submitted to various ethics committees before the changes are  
237 implemented to the study.

238 The PI and study team will conduct the study in compliance with the approved protocol. The PI and  
239 study team will not implement any deviation from or changes to the protocol without prior review and  
240 documented approval from the Ethics Committee. Any unintentional deviations from the protocol will  
241 be reported to the Ethics Committee.

242 Results will be disseminated to the funders, to CBCHB, Cameroon Ministry of Health and interested  
243 parties like the EPI vaccine program. Presentation locally at the internal medicine and surgery residents  
244 of the Baptist Institute of Health Sciences is anticipated. A peer review publication and presentation at  
245 peer reviewed meeting(s) are planned.

246

## 247 **EXPECTED OUTCOMES**

248 At the end of this study we hope to better understand the perspective of parents and their knowledge,  
249 attitudes and beliefs about HPV vaccinations for their young daughters. This is the first study of its kind  
250 in rural communities in the North West Region, Cameroon. This information will help us understand if  
251 there are knowledge gaps that could be addressed through education, or negative attitudes that could  
252 be challenged through peer communication. We anticipate this project could serve as a stepping stone  
253 to similar projects in other regions of Cameroon or intervention projects based on the findings of this  
254 study.

255

## 256 **AUTHORS' CONTRIBUTIONS**

257 Elit- the research team leader and writing of the protocol

258 Ngalla-provided feasibility and cultural input into recruitment and design of the interview guide

259 Afungchwi – provided feasibility and cultural insight into recruitment, design of the interview guide and  
260 analysis

261 Tum-provided cultural input into recruitment and design and reiterations of the interview guide

262 Folkom-Domgue- provided input into the background, rationale and cultural insight into recruitment  
263 and design of the interview guide

264 Nouvet – provided input into the background and rationale, methods and analysis

265

#### 266 COMPETING INTERESTS STATEMENT

267 This is an investigator initiated research project which has been funded by Merck. Merck does not have  
268 access to any of the original material but will be provided with any manuscripts that result from this  
269 work for review prior to publication.

270

#### 271 FUNDING STATEMENT

272 This work was supported by Merck grant number 100035 (Elit 13Oct2021). Merck had no role in the  
273 study design, implementation, data collection. Interpretation and dissemination of the findings of this  
274 study.

275

#### 276 ETHICS APPROVAL

277 Ethics approval was obtained from Hamilton Institutional Research Ethics Board (14022) and Cameroon  
278 Baptist Convention Health Board Institutional Review Board (IRB2021-075).

279

#### 280 REFERENCES

- 281 1. De Martel C, Georges D, Bray F, et al. Global burden of cancer attributable to infections in 2018: A  
282 worldwide incidence analysis. *Lancet Glob. Health.* 2020;8:e180-90.
- 283 2. Arbyn M, Weiderpass E, Bruni L, et al. Estimates of incidence and mortality of cervical cancer in 2018:  
284 A worldwide analysis. *Lancet Glob. Health.* 2020;8:e191–e203.
- 285 3. Lei J, Ploner A, Elfström KM, et al. HPV vaccination and the risk of invasive cervical cancer. *N. Engl. J.*  
286 *Med.* 2020;383:1340–8.
- 287 4. PATH Global HPV vaccine introduction overview. [https://www.path.org/resources/global-hpv-vaccine-](https://www.path.org/resources/global-hpv-vaccine-introduction-overview/)  
288 [introduction-overview/](https://www.path.org/resources/global-hpv-vaccine-introduction-overview/) (2019), Accessed Feb 2020.
- 289 5. Lemp JM, De Neve JW, Bussmann H, et al. Lifetime prevalence of cervical cancer  
290 screening in 55 low- and middle-income countries. *JAMA.* 2020;324:1532-42.
- 291 6. HPV Facts. 2021 for Cameroon ICO/IARC Information Centre on HPV and Cancer  
292 <https://hpcentre.net/statistics/reports/CMR.pdf> Accessed 13Jul2022.
- 293 7. Cameroon Humanitarian situation report no 6. 30Jun2020.  
294 [https://reliefweb.int/report/cameroon/unicf-cameroon-humanitarian-situation-report-n0-6-mid-year-](https://reliefweb.int/report/cameroon/unicf-cameroon-humanitarian-situation-report-n0-6-mid-year-report-january-june-2020)  
295 [report-january-june-2020](https://reliefweb.int/report/cameroon/unicf-cameroon-humanitarian-situation-report-n0-6-mid-year-report-january-june-2020). Accessed 13Jul2022
- 296 8. Ateudjieu J, Yakum MN, Goura AP, et al. EPI Immunization coverage, timeliness and dropout rate among  
297 children in a West Cameroon health district: a cross sectional study. *BMC Public Health* 2020;20:228
- 298 9. WHO. (2010). WHO/ICO Information Centre on HPV and Cervical Cancer (HPV Information Centre).  
299 Human Papillomavirus and Related Cancers in Cameroon. Summary Report 2010.  
300 [www.who.int/hpcentre](http://www.who.int/hpcentre). Accessed 28 Aug 2011.

- 1  
2  
3 301 10. Shelton RC, Snavely AC, De Jesus M, et al. HPV vaccine decision-making and acceptance: does religion  
4 302 play a role? *J Relig Health*. 2013;52(4):1120–30.  
5 303 11. 2020 Cameroon country data. [www.who.int](http://www.who.int). Accessed 16 Feb2022.  
6 304 12. Global strategy to accelerate the elimination of Cervical cancer. 17Nov2020. [www.who.int](http://www.who.int) Accessed  
7 305 21Feb2022.  
8 306 13. Enow Orock GE, Ndom P, Doh AS, 2012. Current cancer incidence and trends in Yaounde, Cameroon.  
9 307 *Oncol Gastroenterol Hepatol Reports*, 1(1), pp.58-63.  
10 308 14. World Health Organization. (2002). Cervical cancer screening in developing countries: Report of a  
11 309 WHO consultation. Geneva: World Health Organization.  
12 310 15. Okyere J, Duodu PA, Aduse-Poku L, et al. Cervical cancer screening prevalence and its correlates in  
13 311 Cameroon. Secondary data analysis of the 2018 demographic and health survey. *BMC Public Health*  
14 312 2021;21;1071-9.  
15 313 16. Wamai RG, Ayissi CA, Oduwo GO, et al. Assessing the effectiveness of a community-based sensitization  
16 314 strategy in creating awareness about HPV, cervical cancer and HPV vaccine among parents in North West  
17 315 Cameroon. *Journal of Community Health* 2012;37(5):917-26.  
18 316 17. Ogembo JG, Manga S, Nulah K, et al. Achieving high uptake of HPV vaccine in Cameroon: Lessons  
19 317 learned in overcoming challenges. *Vaccine* 2014;32(35):4399-403.  
20 318 18. [https://www.journalducameroun.com/en/cameroonnationwide-vaccination-against-cervical-cancer-](https://www.journalducameroun.com/en/cameroonnationwide-vaccination-against-cervical-cancer-to-begin-soon)  
21 319 [to-begin-soon](https://www.journalducameroun.com/en/cameroonnationwide-vaccination-against-cervical-cancer-to-begin-soon) Accessed Apr 15, 2021.  
22 320 19. Marlow LA, Waller J, Wardle J. Public awareness that HPV is a risk factor for cervical cancer. *Br J Cancer*.  
23 321 2007;97(5):691–4.  
24 322 20. Sandelowski M. Whatever happened to qualitative description? *Research in Nursing and health*  
25 323 2000;23(4):334-40.  
26 324 21. Sekhon M, Cartwright M, Francis JJ. Acceptability of healthcare interventions: an overview of reviews  
27 325 and development of a theoretical framework. *BMC Health Services Research*. 2017;17:88.  
28 326  
29  
30  
31  
32  
33 327  
34  
35 328  
36  
37 329  
38  
39  
40  
41  
42  
43  
44  
45  
46  
47  
48  
49  
50  
51  
52  
53  
54  
55  
56  
57  
58  
59  
60

Supplemental Table. Interview guide questions

| Domain                                                                            | Question                                                                                                                            |
|-----------------------------------------------------------------------------------|-------------------------------------------------------------------------------------------------------------------------------------|
| Demographic                                                                       | What is your age                                                                                                                    |
|                                                                                   | Are you a parent?                                                                                                                   |
|                                                                                   | List the age and gender of your children                                                                                            |
|                                                                                   | Have you ever had a vaccine (examples include, measles, mumps, rubella, covid)?                                                     |
|                                                                                   | If yes, which one?                                                                                                                  |
|                                                                                   | Have any of your children had vaccination                                                                                           |
|                                                                                   | If yes, do you know which disease(s) the vaccine prevented?                                                                         |
|                                                                                   | Have you ever had cancer?                                                                                                           |
|                                                                                   | If yes, which type of cancer?                                                                                                       |
|                                                                                   | What is your occupation?                                                                                                            |
|                                                                                   | What is your tribe?                                                                                                                 |
|                                                                                   | Which languages are you comfortable speaking?                                                                                       |
|                                                                                   | What village is closest to where you live?                                                                                          |
| Knowledge                                                                         | Have you ever heard of a vaccine that prevents cancer?                                                                              |
|                                                                                   | If yes, can you tell us what you remember about this vaccine                                                                        |
|                                                                                   | Have you ever heard about the HPV vaccine?                                                                                          |
|                                                                                   | How did you hear about this vaccine?                                                                                                |
|                                                                                   | If yes, can you tell us anything about the vaccine?                                                                                 |
| Attitudes                                                                         | Would you be willing to be vaccinated against a virus that causes cancer?                                                           |
|                                                                                   | If yes, Why?                                                                                                                        |
|                                                                                   | If no, Why not?                                                                                                                     |
|                                                                                   | Would you be willing to have your children vaccinated against a virus that causes cancer?                                           |
|                                                                                   | If yes, Why?                                                                                                                        |
|                                                                                   | If no, Why not?                                                                                                                     |
|                                                                                   | What do you think would be the benefit if your child was vaccinated against HPV?                                                    |
| What do you think could go wrong with your child if she received the HPV vaccine? |                                                                                                                                     |
|                                                                                   | Would you advise someone else to be vaccinated against the HPV?                                                                     |
|                                                                                   | If yes, Why?                                                                                                                        |
|                                                                                   | If no, Why not?                                                                                                                     |
| Beliefs                                                                           | Do you believe vaccines can prevent disease?                                                                                        |
|                                                                                   | If no, can you tell us more                                                                                                         |
|                                                                                   | If yes, can you tell us more                                                                                                        |
|                                                                                   | If you had questions about a vaccine, who would you go to to get more information?                                                  |
|                                                                                   | Those whose daughters have not been vaccinated<br>Are there reasons why you have chosen not to vaccinate your daughter              |
|                                                                                   | Those who are pro vaccine<br>What things do you think could be done to encourage people to have their daughters' vaccinated         |
|                                                                                   | Those who have not had their daughter's vaccinated<br>Is there anything that would make you want to get your daughter's vaccinated? |

## Standards for Reporting Qualitative Research

| Item | Topic                                                        | Page Number                                      | Line number        |
|------|--------------------------------------------------------------|--------------------------------------------------|--------------------|
| S1   | Title                                                        | 1                                                | 1-2                |
| S2   | Abstract                                                     | 2                                                | 23-44              |
| S3   | <b>Introduction</b><br>Problem formation                     | 2-4                                              | 56-120             |
| S4   | Purpose                                                      | 4                                                | 121-126            |
| S5   | <b>Methods</b><br>Qualitative approach and research paradigm | 4                                                | 129-135            |
| S6   | Researcher characteristic and reflexivity                    | 2                                                | 24-29              |
| S7   | Context                                                      | 4                                                | 136-138, 150-163   |
| S8   | Sample strategy                                              | 5                                                | 140-148            |
| S9   | Ethical issues                                               | 6                                                | 203-241            |
| S10  | Data collection methods                                      | 5                                                | 174-178            |
| S11  | Instruments and technologies                                 | 5<br>Table 1                                     | 171-178,           |
| S12  | Units of study                                               | 2<br>4                                           | 30-33<br>136-139   |
| S13  | Data processing                                              | 5<br>6                                           | 174-178<br>190-200 |
| S14  | Data analysis                                                | 6                                                | 186-200            |
| S15  | Trustworthiness                                              | 5                                                | 182-184            |
| S16  | <b>Results</b><br>Synthesis and interpretation               | Will be available when<br>the study is completed |                    |
| S17  | Links to Empirical data                                      |                                                  |                    |
| S18  | Discussion<br>Integration with prior work                    |                                                  |                    |
| S19  | Limitations                                                  | 2                                                | 51-54              |
| S20  | Other<br>Conflicts of Interest                               | 8                                                | 266-269            |
| S21  | Funding                                                      | 8                                                | 272-274            |
