# Supplementary material for: Study protocol for assessing knowledge, attitudes and belief towards HPV vaccination of parents with children aged 9–14 years in rural communities of North West Cameroon: a qualitative study
Source: HighWire-hosted journal article supplement (doi:10.1136/bmjopen-2022-062556), 2022-08-01
Supplement: bmjopen-2022-062556supp001_data_supplement.pdf [file bmjopen-2022-062556supp001_data_supplement.pdf]

Supplemental Table. Interview guide questions

| Domain                                                                            | Question                                                                                                                            |
|-----------------------------------------------------------------------------------|-------------------------------------------------------------------------------------------------------------------------------------|
| Demographic                                                                       | What is your age                                                                                                                    |
|                                                                                   | Are you a parent?                                                                                                                   |
|                                                                                   | List the age and gender of your children                                                                                            |
|                                                                                   | Have you ever had a vaccine (examples include, measles, mumps, rubella, covid)?                                                     |
|                                                                                   | If yes, which one?                                                                                                                  |
|                                                                                   | Have any of your children had vaccination                                                                                           |
|                                                                                   | If yes, do you know which disease(s) the vaccine prevented?                                                                         |
|                                                                                   | Have you ever had cancer?                                                                                                           |
|                                                                                   | If yes, which type of cancer?                                                                                                       |
|                                                                                   | What is your occupation?                                                                                                            |
|                                                                                   | What is your tribe?                                                                                                                 |
|                                                                                   | Which languages are you comfortable speaking?                                                                                       |
| What village is closest to where you live?                                        |                                                                                                                                     |
| Knowledge                                                                         | Have you ever heard of a vaccine that prevents cancer?                                                                              |
|                                                                                   | If yes, can you tell us what you remember about this vaccine                                                                        |
|                                                                                   | Have you ever heard about the HPV vaccine?                                                                                          |
|                                                                                   | How did you hear about this vaccine?                                                                                                |
|                                                                                   | If yes, can you tell us anything about the vaccine?                                                                                 |
| Attitudes                                                                         | Would you be willing to be vaccinated against a virus that causes cancer?                                                           |
|                                                                                   | If yes, Why?                                                                                                                        |
|                                                                                   | If no, Why not?                                                                                                                     |
|                                                                                   | Would you be willing to have your children vaccinated against a virus that causes cancer?                                           |
|                                                                                   | If yes, Why?                                                                                                                        |
|                                                                                   | If no, Why not?                                                                                                                     |
|                                                                                   | What do you think would be the benefit if your child was vaccinated against HPV?                                                    |
| What do you think could go wrong with your child if she received the HPV vaccine? |                                                                                                                                     |
| Attitudes                                                                         | Would you advise someone else to be vaccinated against the HPV?                                                                     |
|                                                                                   | If yes, Why?                                                                                                                        |
|                                                                                   | If no, Why not?                                                                                                                     |
| Beliefs                                                                           | Do you believe vaccines can prevent disease?                                                                                        |
|                                                                                   | If no, can you tell us more                                                                                                         |
|                                                                                   | If yes, can you tell us more                                                                                                        |
|                                                                                   | If you had questions about a vaccine, who would you go to to get more information?                                                  |
|                                                                                   | Those whose daughter's have not been vaccinated<br>Are there reasons why you have chosen not to vaccinate your daughter             |
| Beliefs                                                                           | Those who are pro vaccine<br>What things do you think could be done to encourage people to have their daughters' vaccinated         |
|                                                                                   | Those who have not had their daughter's vaccinated<br>Is there anything that would make you want to get your daughter's vaccinated? |
